# Supplementary material
Source: PubMed Central journal article supplement (PMC4437885)

**Figure 1**

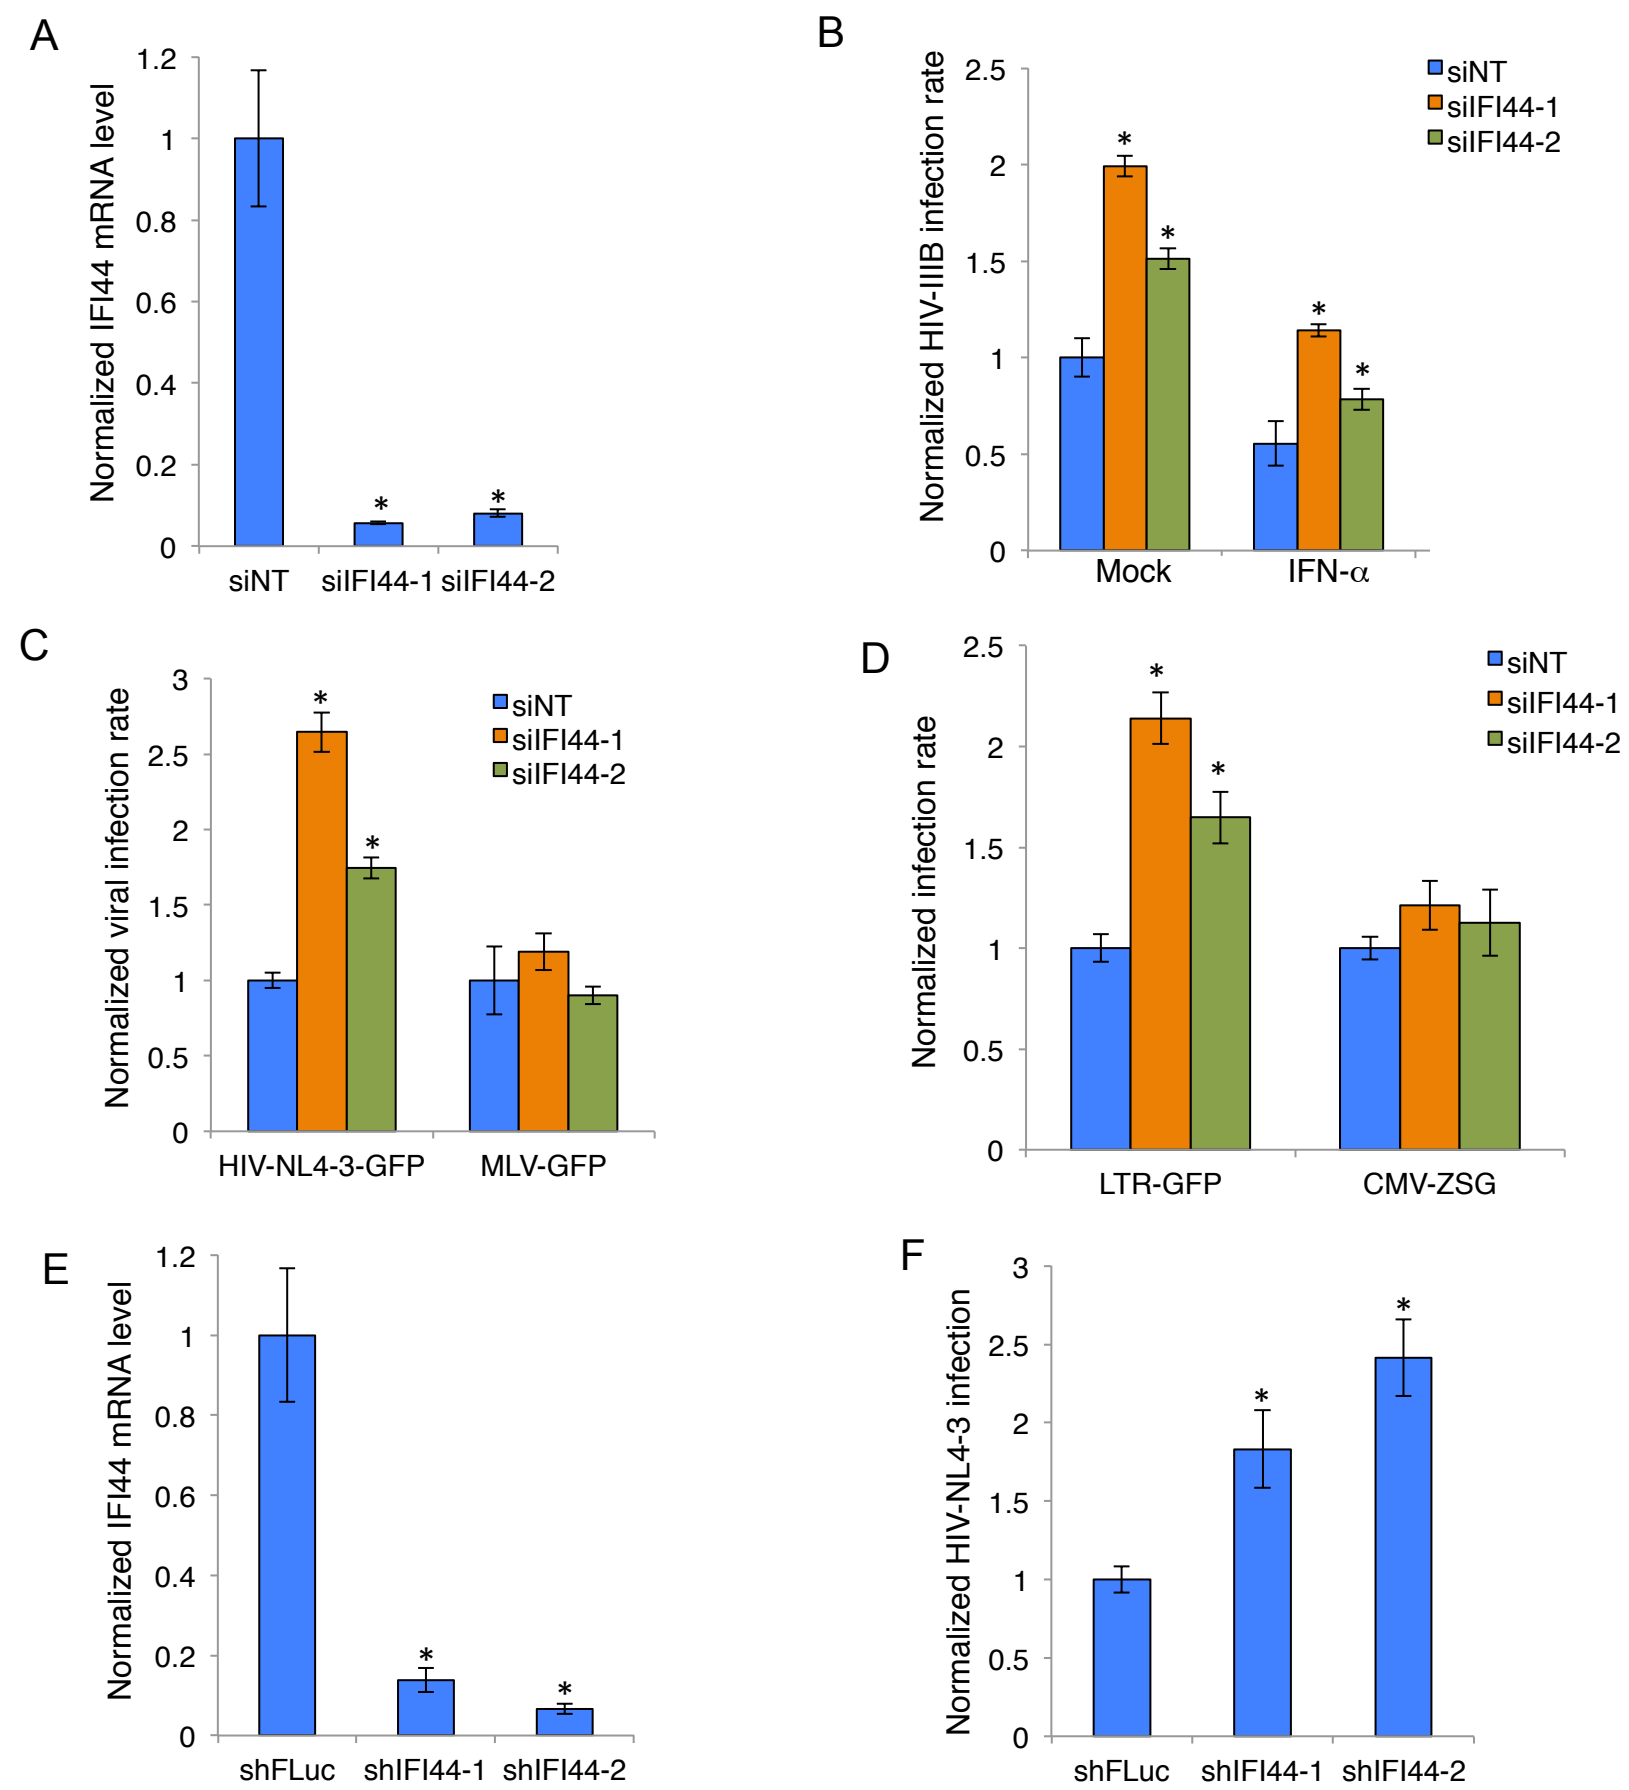

**Figure 2**

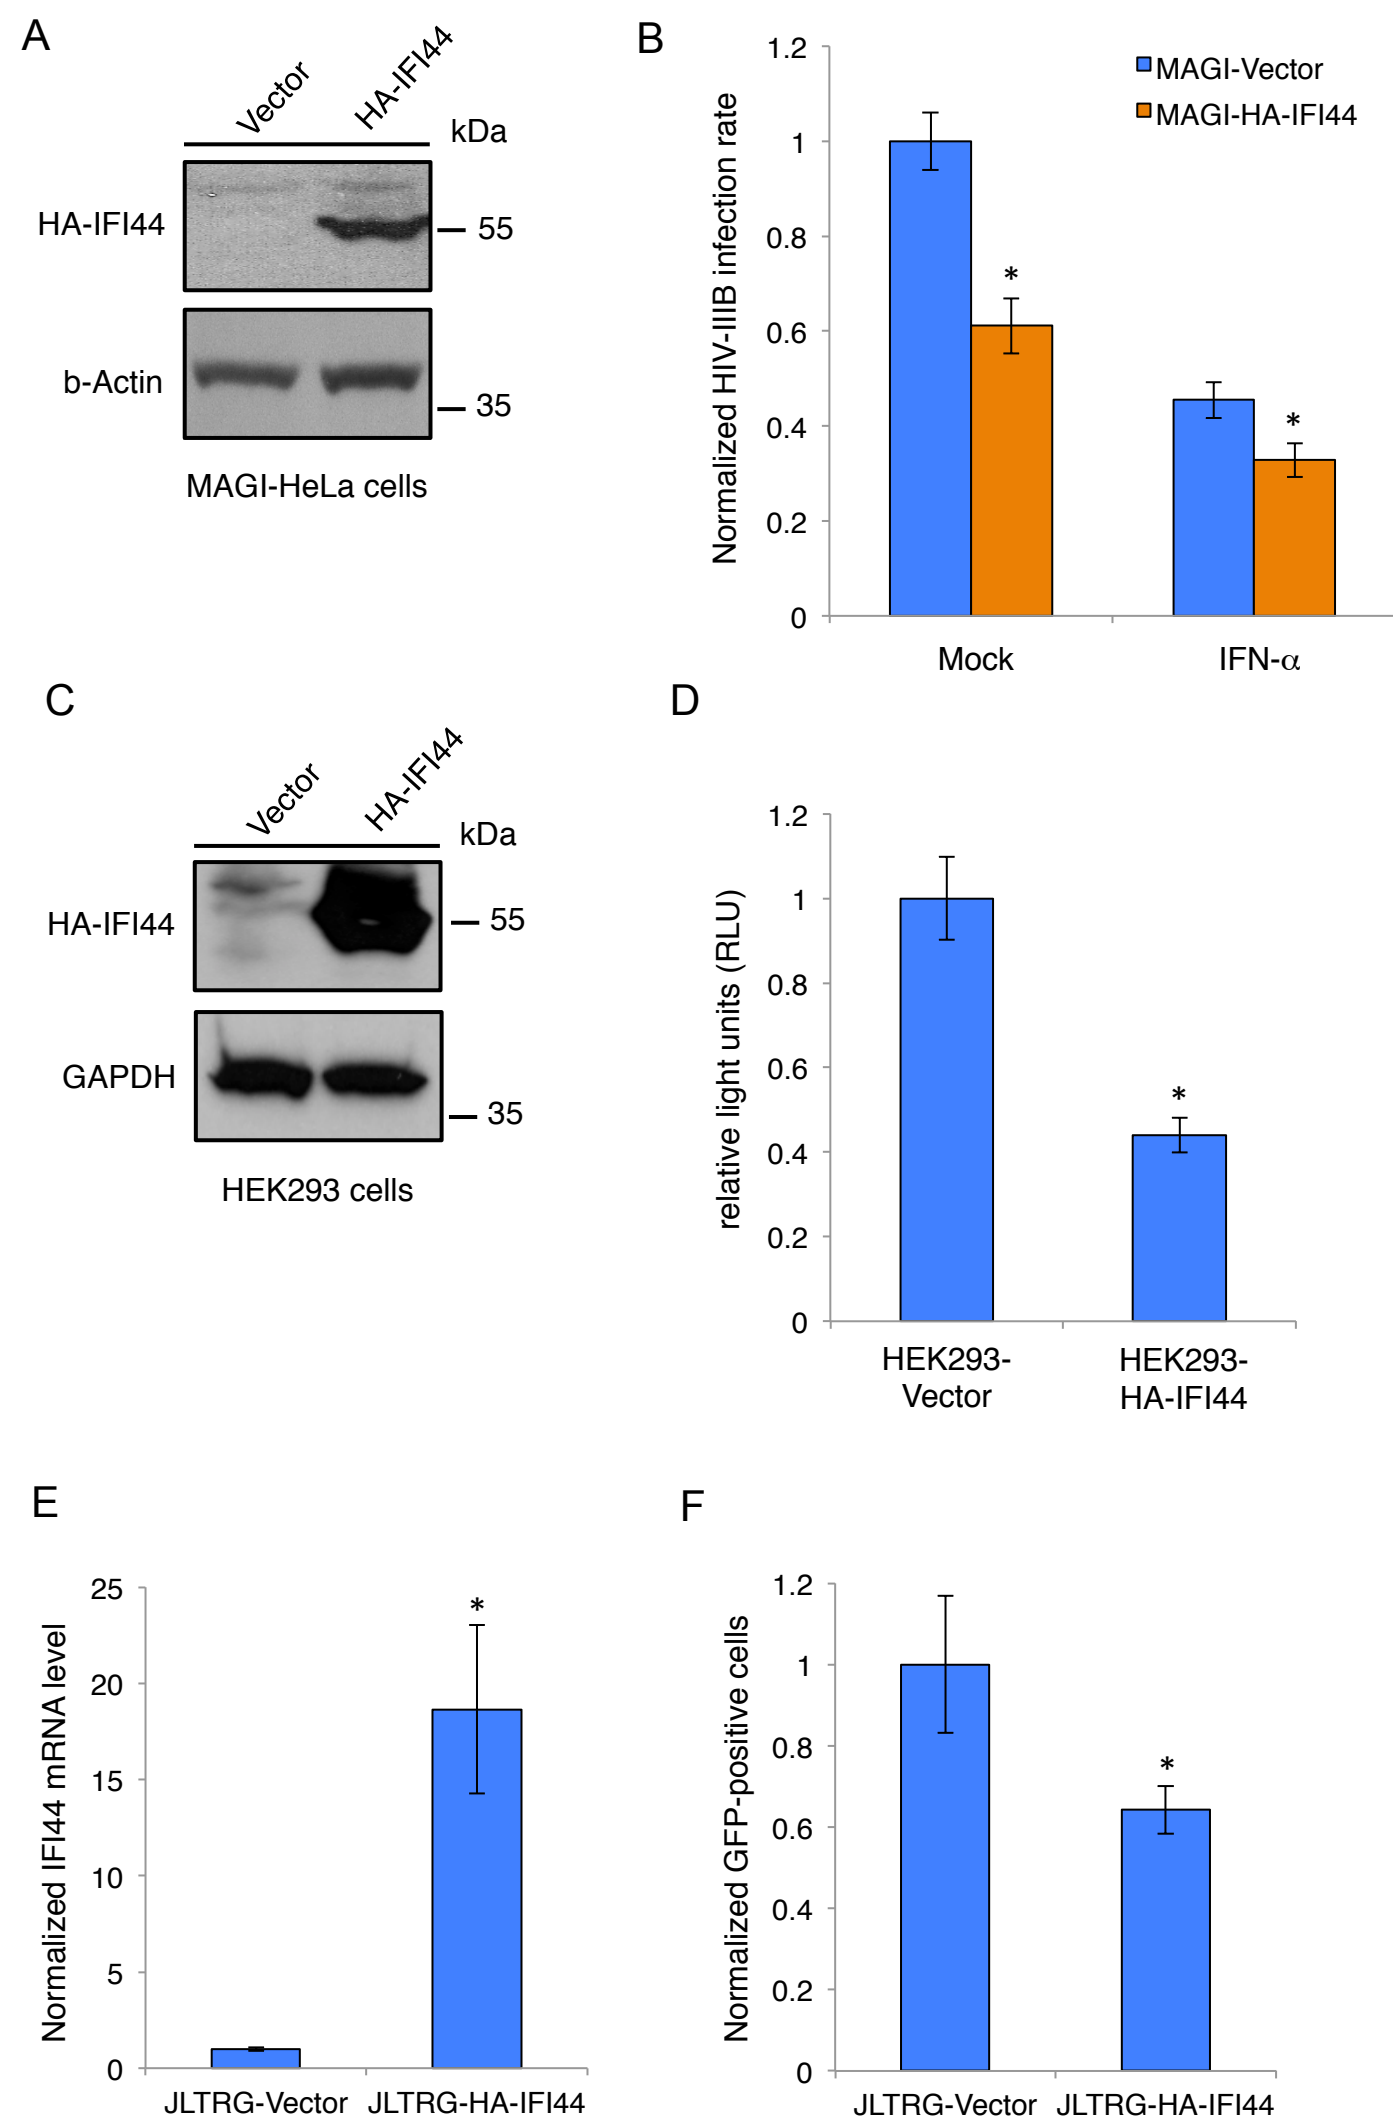

**Figure 3**

**A**

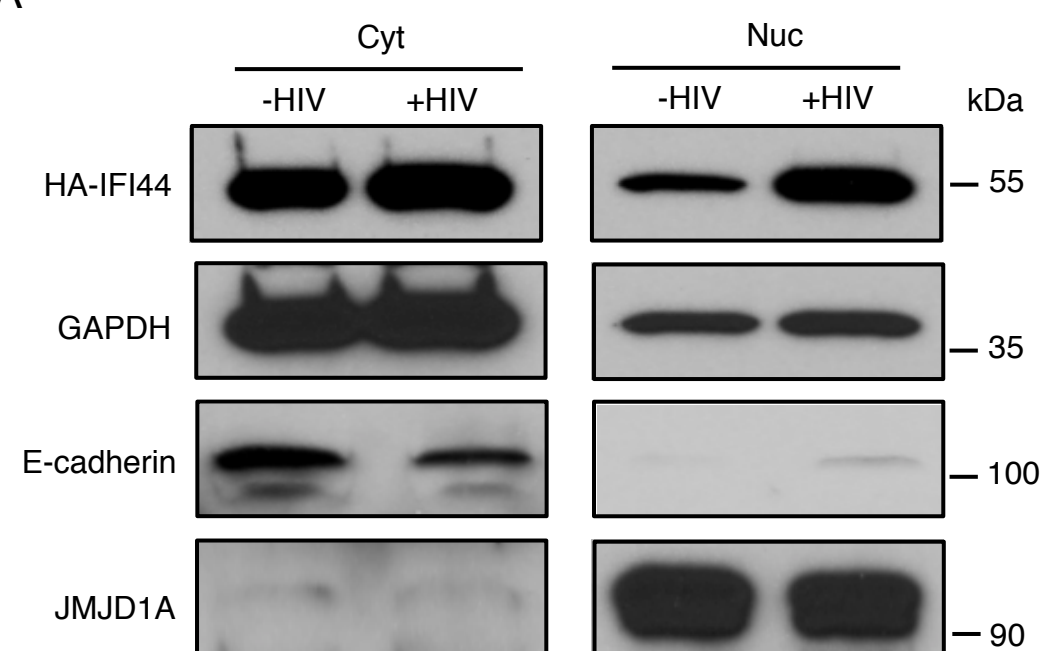

**B**

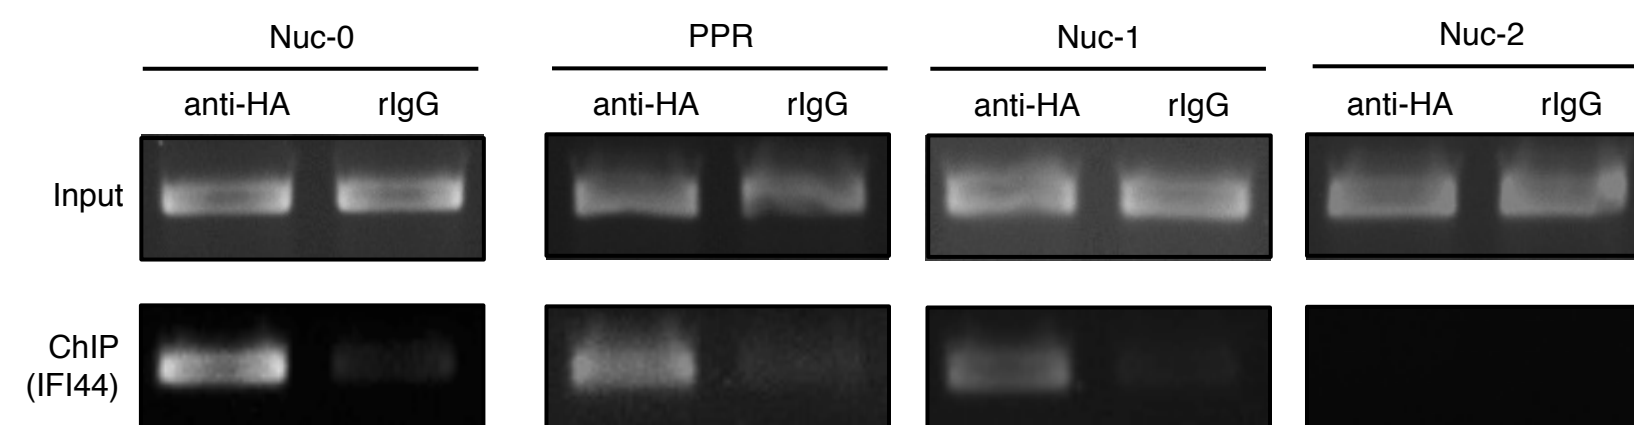

**Figure 4**

**A**

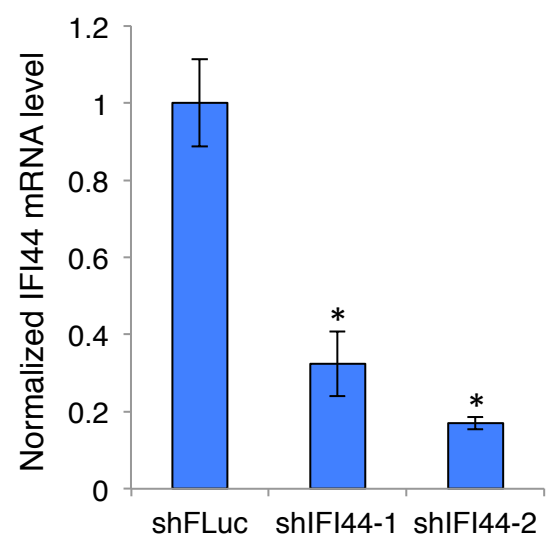

**B**

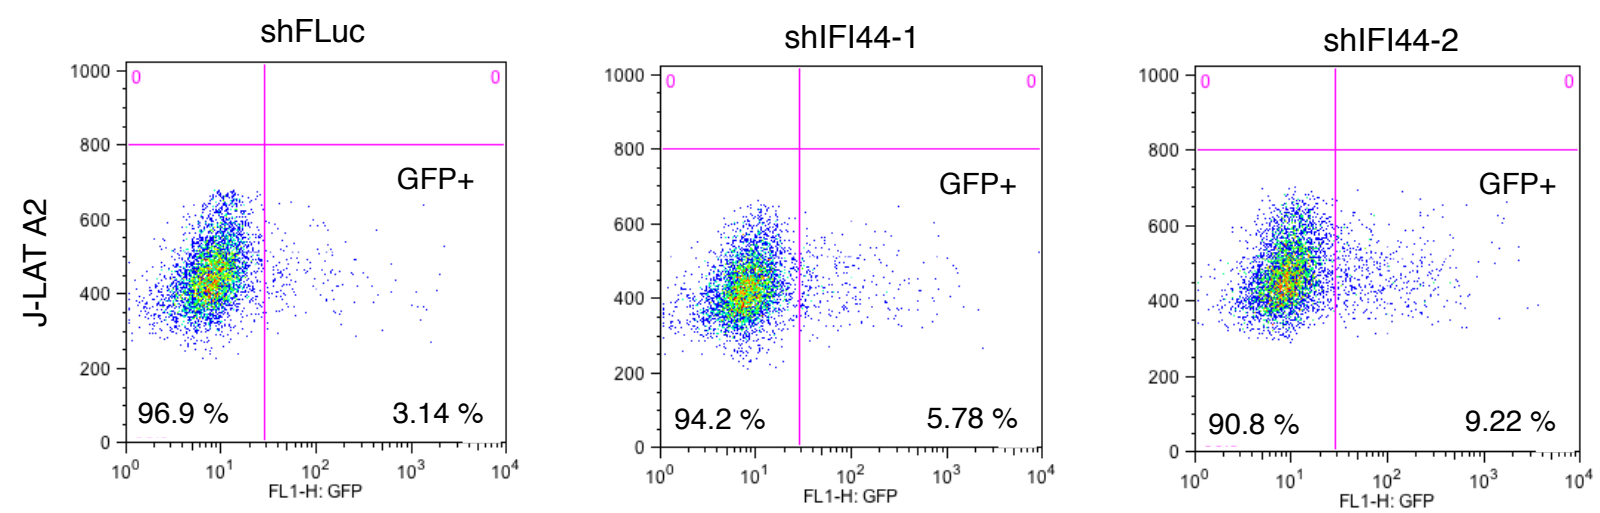

**C**

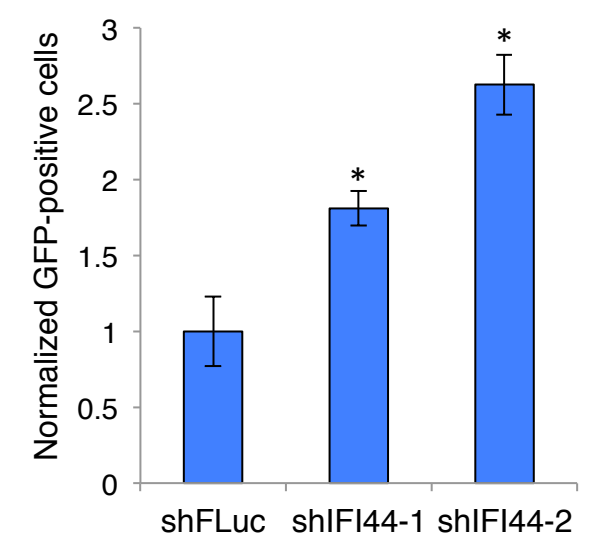

**Figure S1**

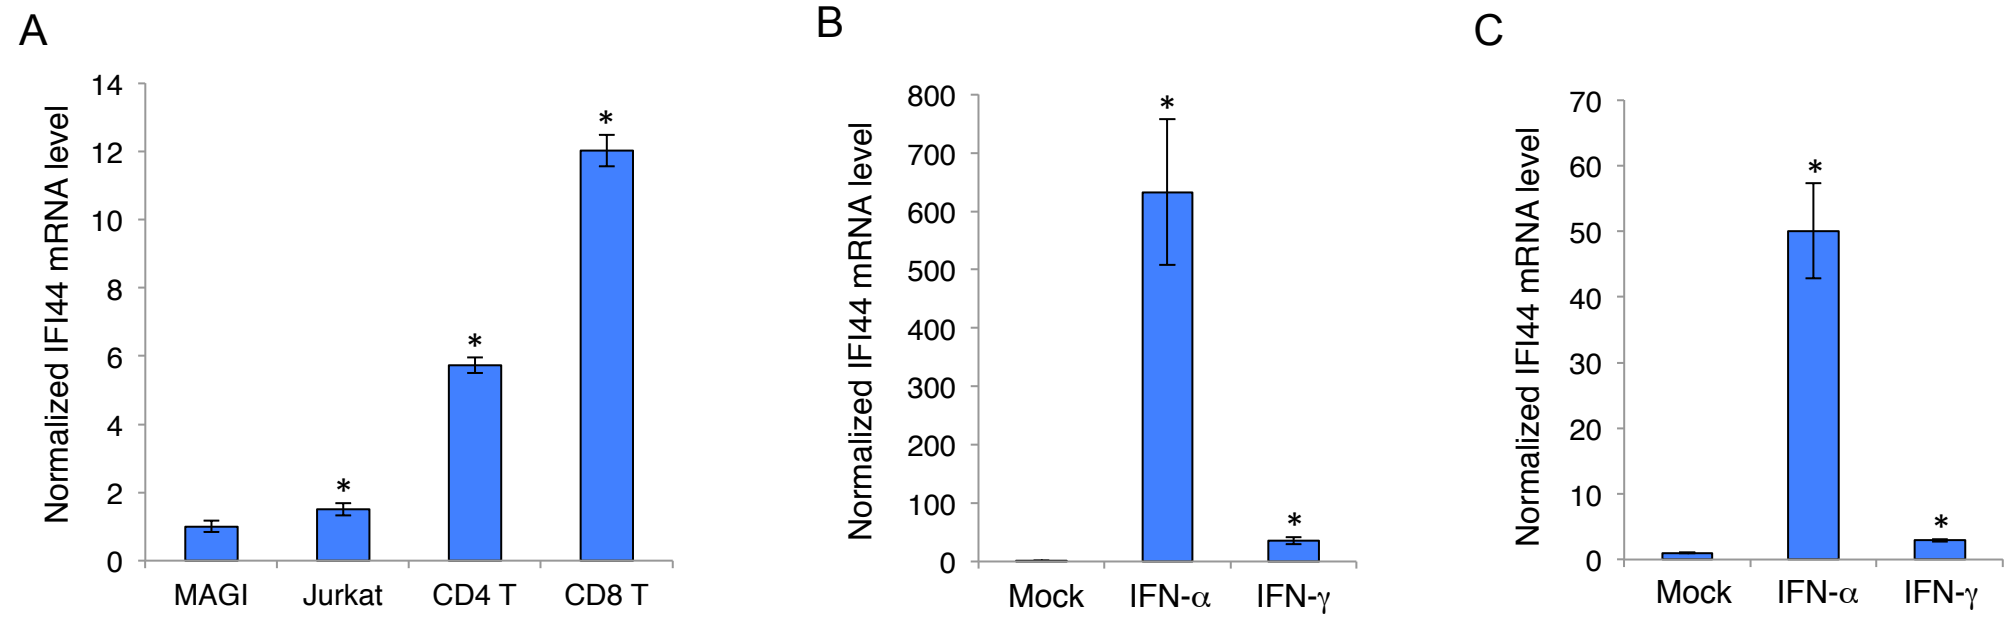

**Figure S2**

**A**

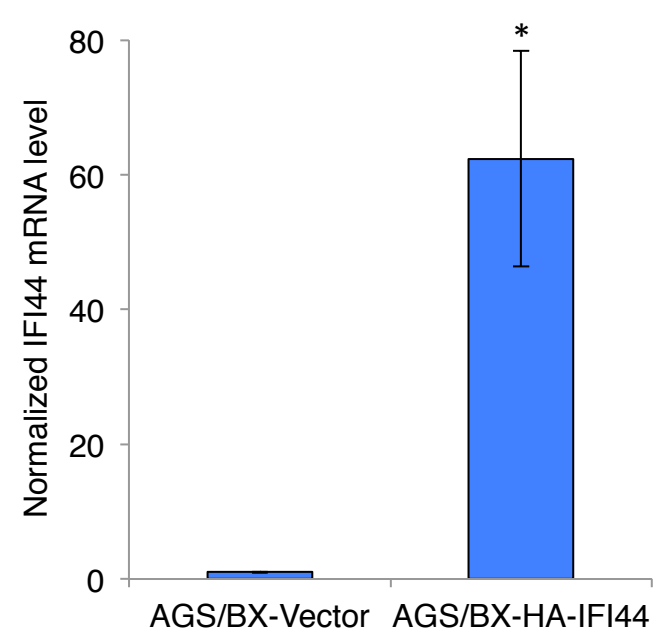

**B**

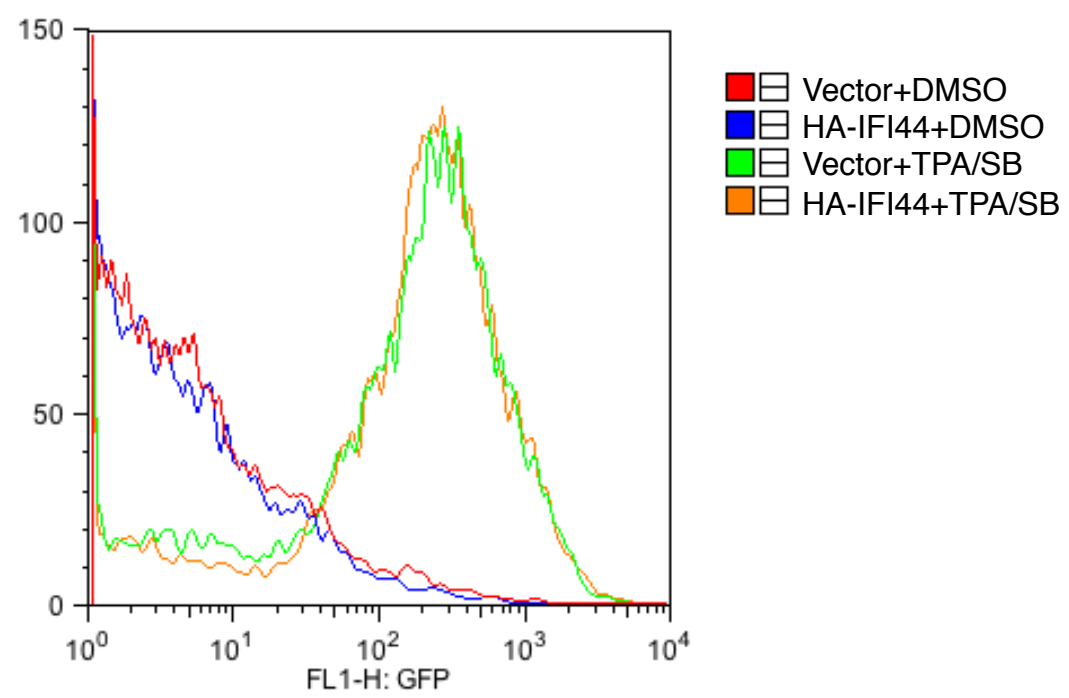

**Figure S3**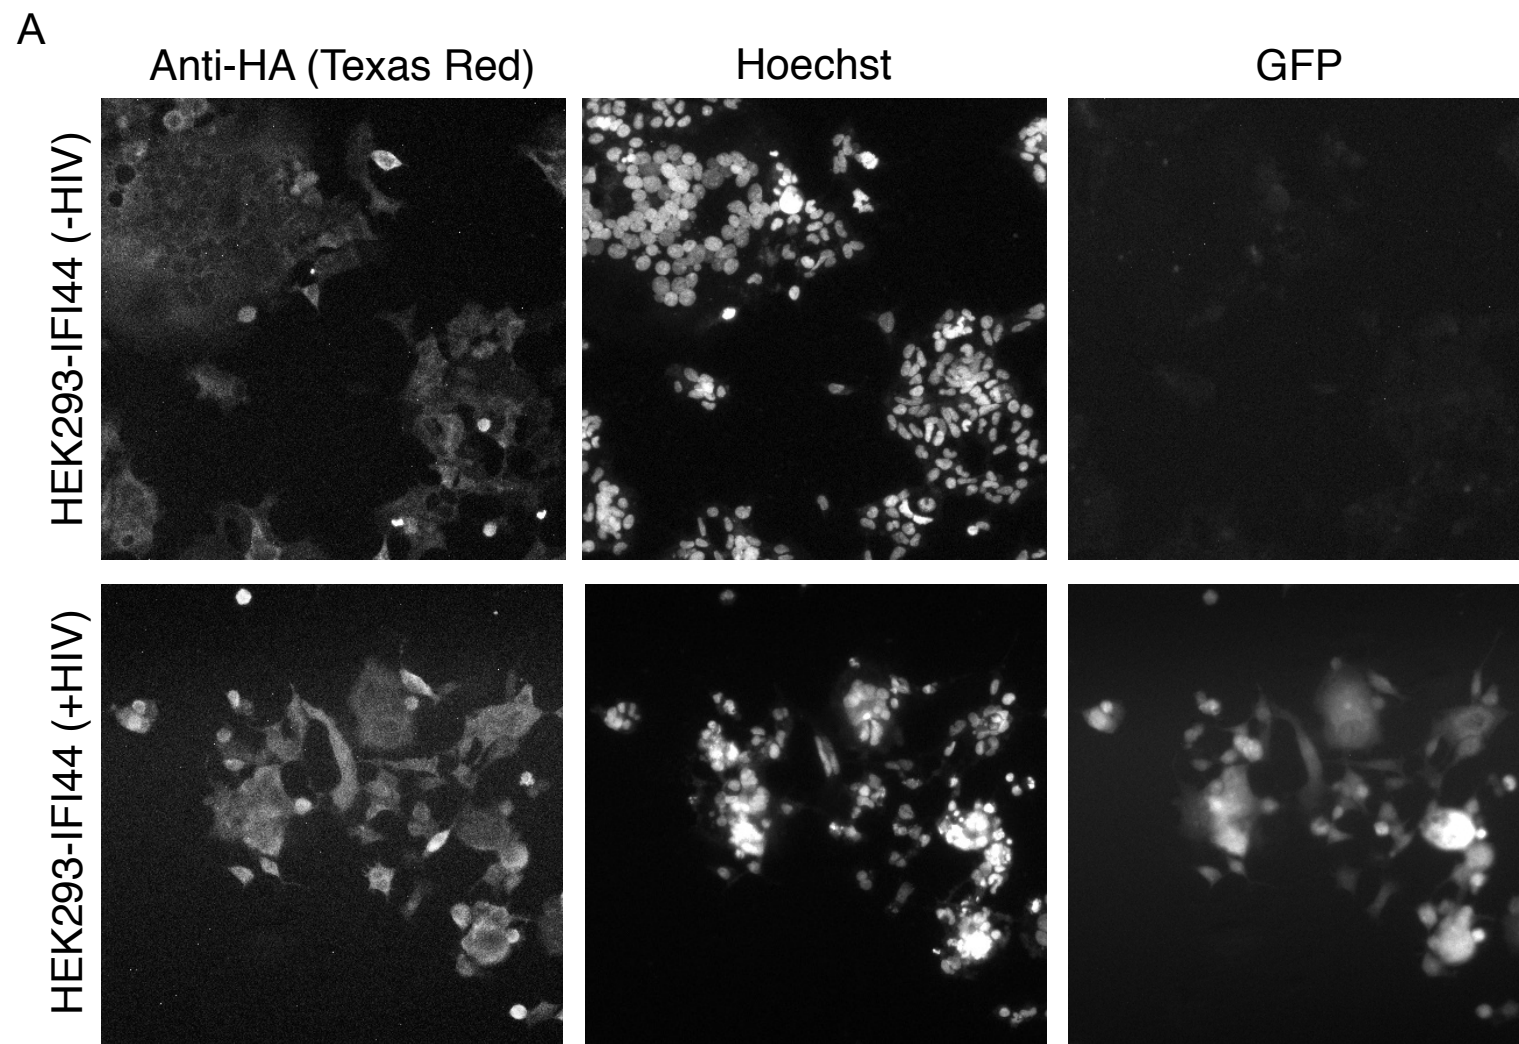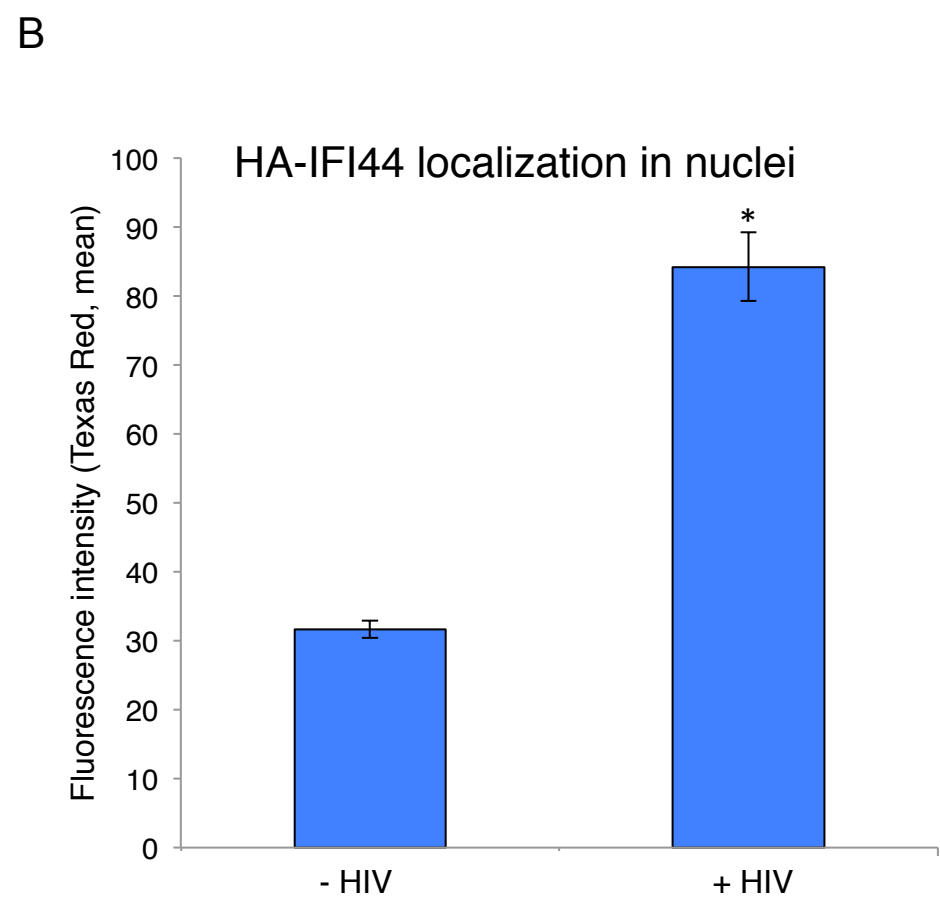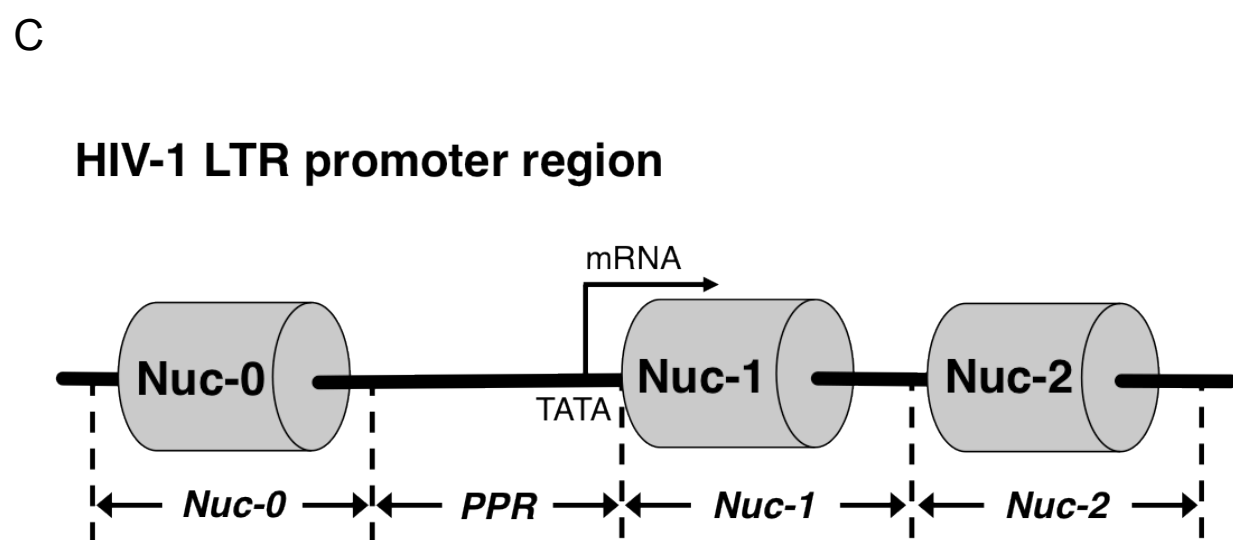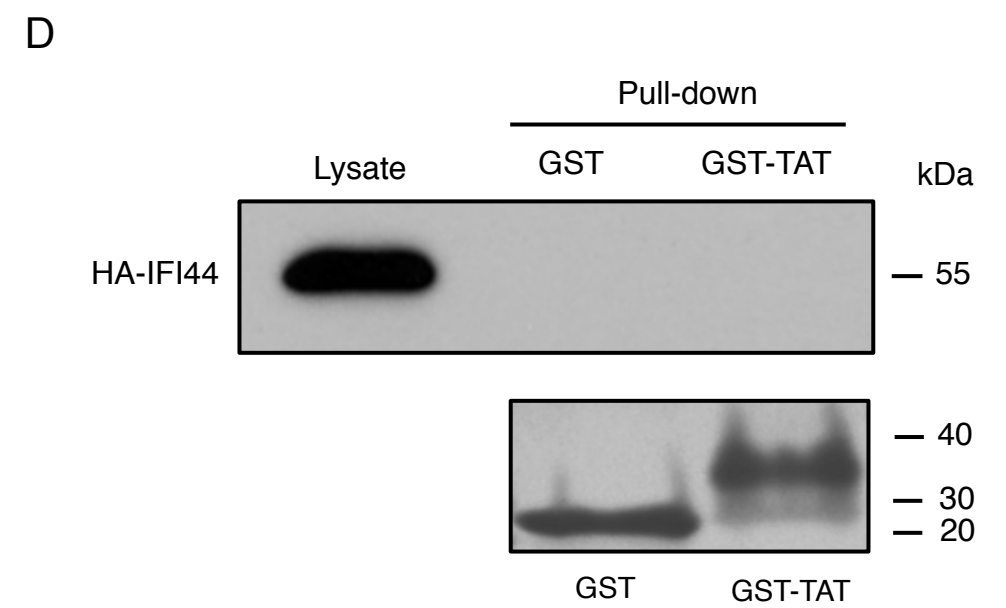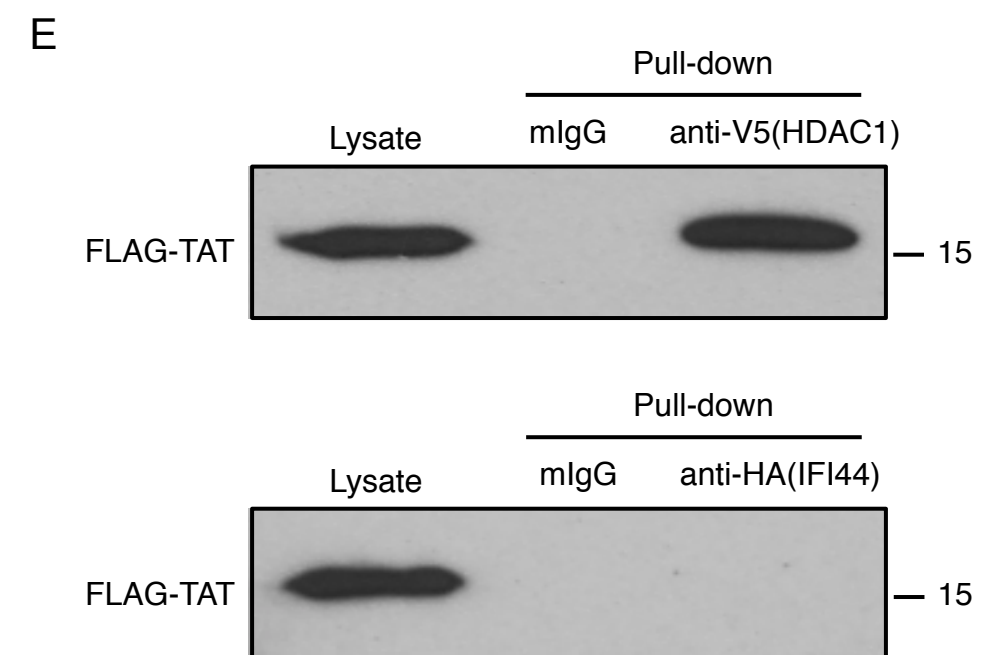

Figure S4

A

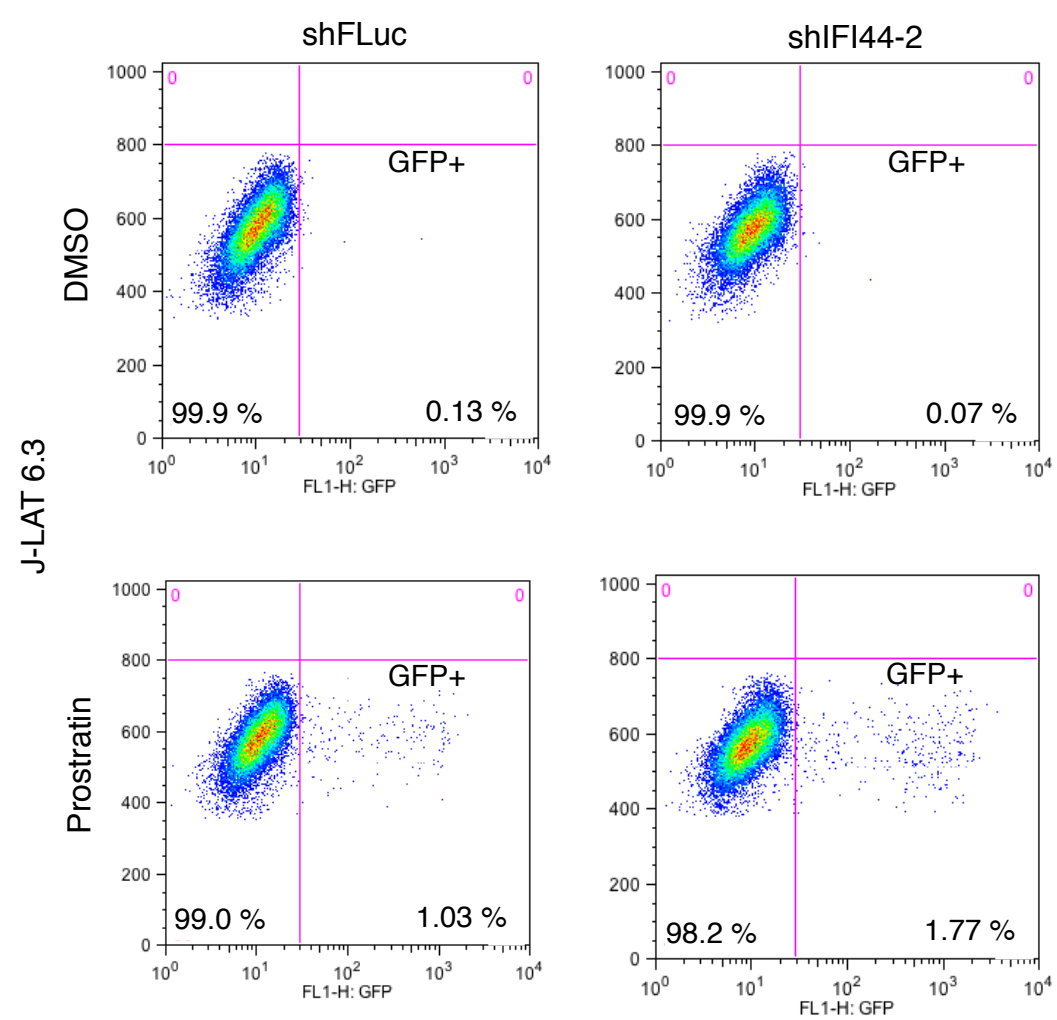

B

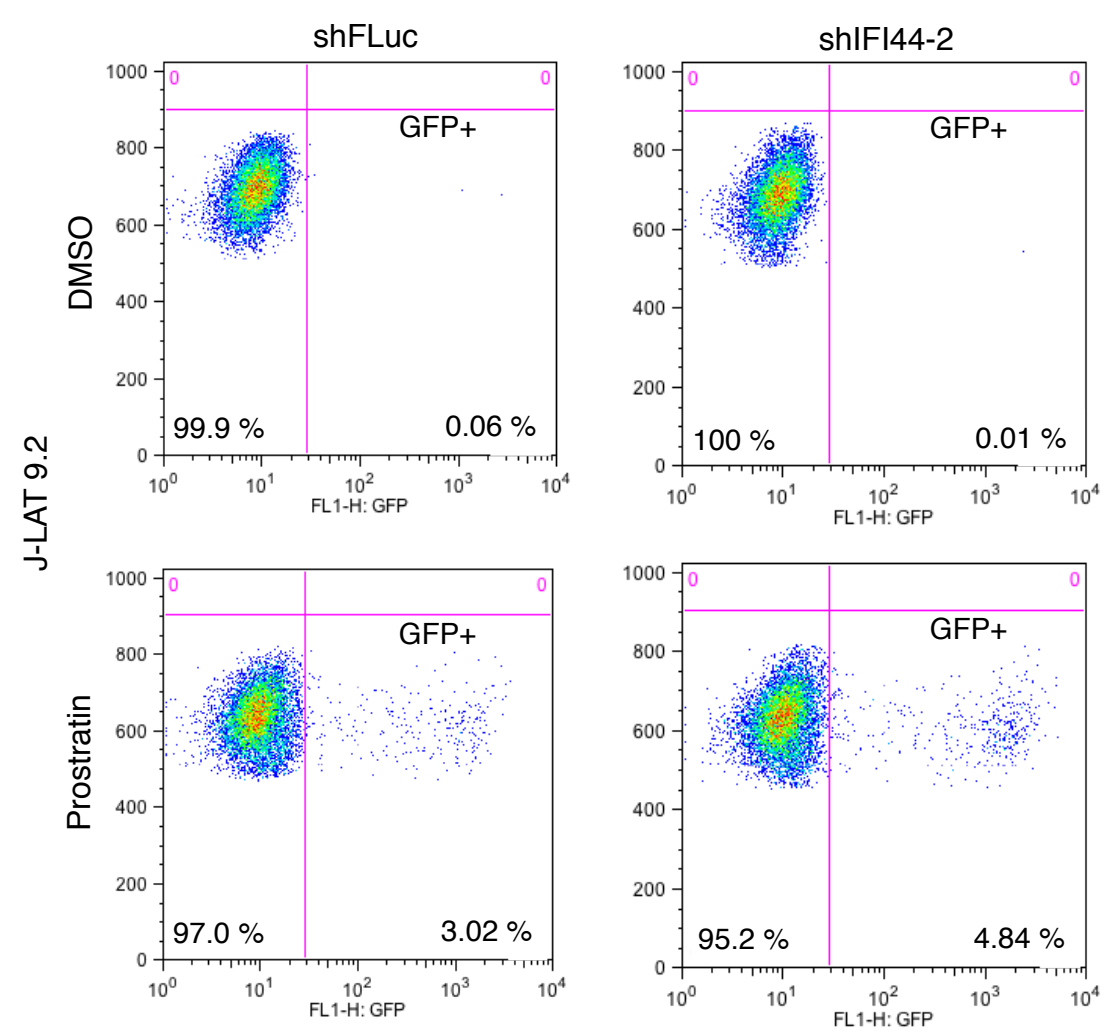

Supplement: NIHMS669320-supplement.pdf [file NIHMS669320-supplement.pdf]
